# Supplementary material for: Intepirdine as adjunctive therapy to donepezil for mild‐to‐moderate Alzheimer's disease: A randomized, placebo‐controlled, phase 3 clinical trial (MINDSET)
Source: PubMed Central journal article supplement — Alzheimers Dement (N Y). 2021 May 31;7(1):e12136. doi: 10.1002/trc2.12136 (PMC8165732; doi:10.1002/trc2.12136), 2021-05-31
Supplement: TRC2-7-e12136-s002.pdf [file TRC2-7-e12136-s002.pdf]

## **SUPPLEMENTARY INFORMATION: COUNTRIES, SITE INVESTIGATORS, AND SAFETY MONITORING COMMITTEE MEMBERS**

**Argentina:** Carlos Alberto Mangone, Enrique Kuper, Luis Daniel Mosca, Ricardo Allegri, Edgardo Reich, Hector Fabian Lamaison, Gerardo Garcia Bonetto, Gaston Noriega, María Elvira Söderlund, Ricardo Marcelo Corral, Daniel Politis, Eduardo Amado Cattaneo, Leonardo Janus Kremer, Carlos Morra, Luis Ernesto Garcia, Hernán Ruggeri, Edith Serfaty, Alberto Rodriguez Alfici, Eugenio Miguel Velasco; **Australia:** Susan Kurrle, Michael Woodward, Gerard Byrne, Ranjeev Chrysanth Pulle, Peter Panegyres, Andrew Gleason, Eli Jakob Kotler; **Bulgaria:** Stefan Todorov, Temenuzhka Dechkova-Novakova, Georgi Onchev, Milena Strashimirova, Plamen Petkov; **Canada:** Paul Latimer, Rodney Klassen, Kevin Kjernisted, Sam Henein, Saibal Nandy, Johannes De Kock, Robert Williams, Sharon Cohen, Richard Bergeron, Giovanni Marotta; **Chile:** Jaime Solis, Sergio Gloger, Manuel Lavados, Luis Alberto Barra; **Croatia:** Igor Filipic, Natasa Klepac, Gordan Makaric, Ninoslav Mimica, Marinko Bilusic; **Czech Republic:** Petra Votypkova, Michal Bajacek, Martin Anders, Ladislav Pazdera, Ilona Divacka; **France:** Mathieu Ceccaldi, Pierre Krolak Salmon, Bruno Dubois, Florence Pasquier; **Germany:** Timo Grimmer, Andreas Lueschow, Josef Priller, Christine von Arnim, Oliver Peters, Klaus-Christian Steinwachs, Erik Strauss, Irma Schoell, Thorsten Lauter, Georg Adler, Frank Jessen, Joachim Springub, Walter Albrecht; **Italy:** Franco Guibiliei, Elena Sinforiani, Giovanni Frisoni, Roberto Bernabei, Innocenzo Rainero, Lucilla Parnetti, Luigi Maria Edoardo Grimaldi, Carlo De Lena, Carlo Caltagirone; **Poland:** Jan Ilkowski, Robert Kucharski, Jacek Dobryniowski, Marcin Ratajczak, Izabela Fadel, Andrzej Szczudlik, Maciej Czarnecki, Stanislaw Ochudło, Gabriela Klodowska, Lech

Szczechowski, Malgorzata Krawczyk; **Serbia:** Jovanka Petrovic, Aleksandar Miljatovic, Zorica Knezevic, Aleksandar Eror, Veselin Savic, Svetlana Kostic-Dedic, Elka Stefanova; **Singapore:** Nagaendran Kandiah, Christopher Philip Chen Li-Hsian; **Slovakia:** Beata Dupejova, Rastislav Korba, Renata Smikova, Eva Palova, Peter Molcan, Magdalena Perichtova; **South Korea:** Kyung Won Park, Doh Kwan Kim, Jun-Young Lee; **Spain:** Teresa Moreno Ramos, Rafael Merino De Torres, Francesc Pujadas Navines, Merce Boada Rovira, Ana Frank Garcia, Albert Puig, Ernest Balaguer, Gurutz Linazasoro, Manuel Fernandez Martinez, Gloria González-Caballero, Raquel Sanchez, Pilar Quílez Ferrer; **Taiwan:** Chiung-Chih Chang, Ming-Jang Chiu, Chin-Chang Huang; **United Kingdom:** Rex Sarmiento, Aliya Asher, Christopher McWilliams, Emer MacSweeney, Victoria Lynch, Roy Jones, Christopher Kipps, Christopher Butler, Peter Bowie, Saif Sharif, Elizabeth Coulthard, Aravind Komuravelli, Zuzana Walker, Chris Fox, Ben Underwood, Stephen Pearson; **United States:** Richard Holub, Beth Safirstein, Ira Goodman, David Subich, Kelli Maw, Stephen Joseph Poland, Brock Summers, Noah Gilson, Mary Stedman, Jean Fils, Harry Croft, Judith Joseph, Dennis Lacey, Robert Riesenber, Nick Vatakis, Joshua Shua-Haim, Mark Goldstein, Bharat Mocherla, J. Gary Booker, Donald Anderson, Cornelius Foley, David Schwartz, Gustavo Alva, Pilar Trueba, Jeffrey Keller, Stephan Flitman, Alan Lerner, Djamchid Lotfi, Paul Solomon, Deborah Gould, Scott Losk, Michael Hassman, Miguel Perez, Ram Shrivistava, Michael Harris, Ronald Schwartz, David Weisman, Carol Manning, Daniel Kaufer, Mario Cornacchione, T. Joseph Raoof, Shivkumar Hatti, David Greeley, Mahmoud Okasha, Laszlo Mate, Anil Nair, Sashi Makam, Alan Siegal, Mohammad Bolouri, Carol Lippa, Richard Shubin, John Duffy, Arnold Witte, Ashok Patel, Alexander

Bystritsky, Gerald Tramontano, Marc Agronin, Jonathan Liss, Jeanette Wendt, Kevin Groom, Bruce Kohrman, Marvin Lane Peyton, Laja Ibraheem, Alvaro Padilla, Stephen Waldman, Muhammad Aslam

**Safety Monitoring Committee:** David Reid Cornblath, Argye Hillis, David Bristol
